# Supplementary material
Source: PubMed Central journal article supplement (PMC7356482)
Supplement: tpmd190605.SD1.pdf [file tpmd190605.SD1.pdf]

**Supplemental Materials**

Table S1. Missing data by variable

| Variable                                         | Total Missing (n=101) | Missing from Study Cohort (n=76) |
|--------------------------------------------------|-----------------------|----------------------------------|
| qSOFA, n (%)                                     | 25 (25)               | 0 (0)                            |
| Clinically suspected infection, n (%)            | 25 (25)               | (0)                              |
| Male, n(%)                                       | 25 (25)               | 0 (0)                            |
| Age, median (IQR)                                | (28)                  | 3 (4)                            |
| Study Unit (ICU versus HDU location)             | 26 (25)               | 1 (1)                            |
| Surgery Preceding HDU/ICU Admission, n (%)       | 28 (28)               | 3 (4))                           |
| Vital Signs at HDU/ICU Admission                 |                       |                                  |
| Heart rate, median (IQR)                         | 28 (28)               | 3 (4)                            |
| Respiratory rate, median (IQR)                   | 28 (28)               | 3 (4)                            |
| Mean arterial pressure (mmHg), median (IQR)      | 28 (28)               | 3 (4)                            |
| Presence of Fever (>38.4°C) during course, n (%) | 28 (28)               | 3 (4)                            |
| Laboratory Measurements                          |                       |                                  |
| HIV positive, n (%)                              | 30 (30)               | 5 (7)                            |

|                                     |         |       |
|-------------------------------------|---------|-------|
| Malaria, n (%)                      | 30 (30) | 5 (7) |
| Leukocyte count,<br>median (IQR)    | 26 (26) | 1 (1) |
| Blood culture, n (%)                | 25(25)  | 0 (0) |
| Urine culture, n (%)                | 25 (25) | 0 (0) |
| Outcomes                            |         |       |
| Hospital discharge<br>status, n (%) | 25 (25) | 0 (0) |

Table S2. Demographics of patients included in study cohort versus those excluded for missing data

| Variable                                                           | Cohort (n=76) | Excluded for missing data (n=27) |  |
|--------------------------------------------------------------------|---------------|----------------------------------|--|
| qSOFA $\geq 2$ , n (%)                                             | 18 (24)       | All values missing               |  |
| Clinically suspected infection, n (%)                              | 50 (66)       | All values missing               |  |
| Male, n(%)                                                         | 30 (39)       | All values missing               |  |
| Age, median (IQR)                                                  | 30 (23-40)    | All values missing               |  |
| Study Unit                                                         |               | All values missing               |  |
| ICU                                                                | 12 (16)       |                                  |  |
| HDU-Medicine                                                       | 22 (29)       |                                  |  |
| HDU-OBGyn                                                          | 24 (32)       |                                  |  |
| HDU-Surgery                                                        | 18 (24)       |                                  |  |
| Surgery Preceding HDU/ICU Admission, n (%)                         | 34 (46)       | All values missing               |  |
| Vital Signs at HDU/ICU Admission                                   |               |                                  |  |
| Heart rate, median (IQR)                                           | 109 (88-134)  | All values missing               |  |
| Respiratory rate, median (IQR)                                     | 24 (18-30)    | All values missing               |  |
| Mean arterial pressure (mmHg), median (IQR)                        | 86 (76-100)   | All values missing               |  |
| Presence of Fever ( $>38.4^{\circ}\text{C}$ ) during course, n (%) | 28 (38)       | All values missing               |  |

|                               |          |                    |  |
|-------------------------------|----------|--------------------|--|
| Laboratory Measurements       |          |                    |  |
| HIV positive, n (%)           | 8 (13)   | All values missing |  |
| Malaria, n (%)                | 16 (23)  | All values missing |  |
| Leukocyte count, median (IQR) | 9 (6-15) | All values missing |  |
| Outcomes                      |          |                    |  |
| Hospital death , n (%)        | 24 (32)  | All values missing |  |

**Table S3. Reasons for ICU/HDU Admission**

|                                              | N (%)     |
|----------------------------------------------|-----------|
| Altered mental status or Neurological injury | 13        |
| Diabetic Ketoacidosis or Hypoglycemia        | 10        |
| Heart Failure                                | 2         |
| Shock                                        | 13        |
| Peritonitis                                  | 6         |
| Postoperative Monitoring/General Observation | 22        |
| Pregnancy complications, antepartum          | 2         |
| Respiratory distress                         | 8         |
| <b>Total</b>                                 | <b>76</b> |
