# Supplementary material
Source: PubMed Central journal article supplement (PMC7356482)
Supplement: tpmd190605.SD2.pdf [file tpmd190605.SD2.pdf]

**Supplemental Appendix 1.** Clinical Characteristics of Critically ill Cohort at Referral Hospital in Malawi, Stratified by 3 definitions of Sepsis

applicable in a low-resource environment

| Sepsis definition:                         | qSOFA $\geq 2$<br>(n=18) | No Sepsis<br>(n=58) | p-value | Clinically Suspected Systemic Infection (n=50) | No Sepsis<br>(n=26) | p-value | qSOFA $\geq 2$ plus Clinically Suspected Systemic Infection<br>(n=12) | No Sepsis<br>(n=64) | p-value |
|--------------------------------------------|--------------------------|---------------------|---------|------------------------------------------------|---------------------|---------|-----------------------------------------------------------------------|---------------------|---------|
| Male, n(%)                                 | 7 (39)                   | 23 (40)             | 0.954   | 16 (32)                                        | 14 (54)             | 0.065   | 3 (25)                                                                | 27 (42)             | 0.264   |
| Age, median (IQR)                          | 33 (21-40)               | 30 (23-42)          | 0.623   | 28 (22-37)                                     | 36 (30-49)          | 0.046   | 31 (19-53)                                                            | 30 (23-40)          | 0.591   |
| Study Unit                                 |                          |                     | 0.945   |                                                |                     | <0.001  |                                                                       |                     | 0.931   |
| ICU                                        | 2 (11)                   | 9 (16)              |         | 11 (22)                                        | 0 (0)               |         | 2 (17)                                                                | 9 (14)              |         |
| HDU-Medicine                               | 5 (28)                   | 17 (30)             |         | 18 (37)                                        | 4 (15)              |         | 4 (33)                                                                | 18 (29)             |         |
| HDU-OBGyn                                  | 6 (33)                   | 18 (32)             |         | 15 (31)                                        | 9 (34)              |         | 4 (33)                                                                | 20 (32)             |         |
| HDU-Surgery                                | 5 (28)                   | 13 (23)             |         | 5 (10)                                         | 13 (50)             |         | 2 (17)                                                                | 16 (25)             |         |
| Surgery Preceding HDU/ICU Admission, n (%) | 8 (44)                   | 26 (46)             | 0.883   | 23 (46)                                        | 11 (46)             | 0.989   | 5 (42)                                                                | 29 (47)             | 0.745   |
| Vital Signs at HDU/ICU Admission           |                          |                     |         |                                                |                     |         |                                                                       |                     |         |
| Heart rate, median (IQR)                   | 119 (80-139)             | 107 (88-133)        | 0.469   | 116 (93-143)                                   | 97 (79-117)         | 0.999   | 120 (100-144)                                                         | 107 (88-133)        | 0.726   |
| Respiratory rate,                          | 28 (22-31)               | 22 (18-             | 0.979   | 24 (18-30)                                     | 24 (19-             | 0.592   | 27 (22-32)                                                            | 23 (18-             | 0.932   |

|                                                  |            |             |        |            |             |       |            |             |        |
|--------------------------------------------------|------------|-------------|--------|------------|-------------|-------|------------|-------------|--------|
| median (IQR)                                     |            | 28)         |        |            | 30)         |       |            | 30)         |        |
| Mean arterial pressure (mmHg), median (IQR)      | 72 (64-87) | 90 (79-106) | 0.0002 | 86 (69-99) | 92 (77-113) | 0.045 | 67 (57-89) | 88 (78-104) | 0.001  |
| Presence of Fever (>38.4°C) during course, n (%) | 8 (44)     | 20 (36)     | 0.724  | 23 (46)    | 5 (22)      | 0.096 | 7 (58)     | 21 (34)     | 0.284  |
| Laboratory Measurements                          |            |             |        |            |             |       |            |             |        |
| HIV positive, n (%)                              | 2 (15)     | 6 (13)      | 0.806  | 7 (17)     | 1 (6)       | 0.246 | 2 (22)     | 6 (12)      | 0.395  |
| Malaria, n (%)                                   | 4 (24)     | 12 (22)     | 0.280  | 11 (23)    | 5 (22)      | 0.856 | 2 (18)     | 14 (23)     | 0.115  |
| Leukocyte count, median (IQR)                    | 12 (6-19)  | 9 (6-13)    | 0.878  | 10 (5-15)  | 8 (7-14)    | 0.627 | 12 (6-19)  | 9 (6-14)    | 0.833  |
| Outcomes                                         |            |             |        |            |             |       |            |             |        |
| Hospital death, n (%)                            | 9 (50)     | 15 (26)     | 0.054  | 21 (42)    | 3 (12)      | 0.007 | 9 (75)     | 15 (23)     | <0.001 |

qSOFA: quick Sequential Organ Failure Assessment; IQR: interquartile range; ICU: Intensive Care Unit; HDU: High-dependency unit; OBGyn: Obstetrics and Gynecology; mmHg: millimeters of Mercury; C: Celcius; HIV: human immunodeficiency virus
